# Supplementary material for: Development and Validation of a Machine Learning–Based Model for Predicting Textbook Outcome after Minimally Invasive Pancreaticoduodenectomy
Source: Research Square preprint supplement (doi:10.21203/rs.3.rs-8269976/v1), 2025-12-10
Supplement: Supplementary file 1 [file af951ed466deccc8b3938069.docx]

Supplementary Table S2 Clinical characteristics between training set and validation set

| Variables | Total (n = 411) | Training set (n = 287) | Validation set (n = 124) | *P* |
| --- | --- | --- | --- | --- |
|
| Age, years | 65.00 (57.00, 71.00) | 65.00 (58.00, 71.00) | 64.00 (57.00, 71.00) | 0.568 |
| Male |  |  |  | 0.795 |
| NO | 173 (42.09) | 122 (42.51) | 51 (41.13) |  |
| Yes | 238 (57.91) | 165 (57.49) | 73 (58.87) |  |
| Hypertension |  |  |  | 0.396 |
| NO | 239 (58.15) | 163 (56.79) | 76 (61.29) |  |
| Yes | 172 (41.85) | 124 (43.21) | 48 (38.71) |  |
| Diabetes |  |  |  | 0.567 |
| NO | 306 (74.45) | 216 (75.26) | 90 (72.58) |  |
| Yes | 105 (25.55) | 71 (24.74) | 34 (27.42) |  |
| Previous abdominal surgery |  |  |  | 0.149 |
| NO | 292 (71.05) | 210 (73.17) | 82 (66.13) |  |
| Yes | 119 (28.95) | 77 (26.83) | 42 (33.87) |  |
| Pancreatic duct diameter > 3mm |  |  |  | 0.111 |
| NO | 136 (33.09) | 88 (30.66) | 48 (38.71) |  |
| Yes | 275 (66.91) | 199 (69.34) | 76 (61.29) |  |
| Pathology |  |  |  | 0.373 |
| Malignant | 326 (79.32) | 231 (80.49) | 95 (76.61) |  |
| Benign | 85 (20.68) | 56 (19.51) | 29 (23.39) |  |
| Location |  |  |  | 0.255 |
| Other | 163 (39.66) | 119 (41.46) | 44 (35.48) |  |
| Pancreas | 248 (60.34) | 168 (58.54) | 80 (64.52) |  |
| BMI, kg/m2 | 22.43 (20.60, 24.33) | 22.46 (20.66, 24.28) | 22.35 (20.52, 24.36) | 0.987 |
| NRS-2002 score | 2.00 (1.00, 4.00) | 2.00 (1.00, 4.00) | 2.00 (1.00, 4.00) | 0.600 |
| Hemoglobin, g/L | 123.00 (110.00, 134.00) | 123.00 (108.00, 132.50) | 125.00 (111.75, 137.50) | 0.082 |
| WBC, 10^9/L | 5.59 (4.66, 6.78) | 5.58 (4.67, 6.80) | 5.61 (4.58, 6.75) | 0.993 |
| Neutrophil, 10^9/L | 3.50 (2.70, 4.50) | 3.50 (2.73, 4.53) | 3.48 (2.68, 4.36) | 0.698 |
| Lymphocyte, 10^9/L | 1.40 (1.10, 1.79) | 1.40 (1.10, 1.75) | 1.40 (1.12, 1.80) | 0.365 |
| Platelet, 10^9/L | 220.00 (174.50, 268.50) | 220.00 (171.00, 264.00) | 226.50 (178.00, 276.25) | 0.338 |
| Monocyte, 10^9/L | 0.40 (0.30, 0.50) | 0.40 (0.30, 0.50) | 0.40 (0.30, 0.50) | 0.990 |
| Albumin, g/L | 37.00 (34.10, 40.48) | 37.10 (34.25, 40.25) | 36.75 (33.90, 41.30) | 0.992 |
| Total bilirubin, μmol/L | 19.55 (11.30, 72.38) | 19.55 (11.50, 78.30) | 19.25 (10.78, 63.20) | 0.467 |
| Direct bilirubin, μmol/L | 4.80 (2.30, 35.80) | 4.80 (2.40, 39.00) | 4.80 (2.08, 30.97) | 0.404 |
| AST, U/L | 32.00 (20.25, 76.00) | 32.00 (20.50, 67.50) | 32.00 (21.00, 61.50) | 0.552 |
| ALT, U/L | 38.00 (17.00, 99.50) | 37.00 (17.00, 99.00) | 40.00 (20.00, 102.00) | 0.465 |
| Total Cholesterol, mmol/L | 4.61 (3.64, 5.43) | 4.62 (3.64, 5.42) | 4.53 (3.68, 5.44) | 0.965 |
| HDL-C, mmol/L | 0.97 (0.69, 1.19) | 0.97 (0.67, 1.19) | 0.93 (0.72, 1.12) | 0.553 |
| LDL-C, mmol/L | 2.86 (2.17, 3.45) | 2.86 (2.19, 3.42) | 2.86 (2.22, 3.20) | 0.809 |
| Creatinine, μmol/L | 66.60 (57.80, 78.70) | 66.60 (58.65, 78.40) | 66.30 (55.40, 80.33) | 0.366 |
| Glucose, mmol/L | 5.39 (4.80, 6.50) | 5.38 (4.84, 6.34) | 5.46 (4.76, 6.59) | 0.990 |
| Triglyceride, mmol/L | 1.33 (0.95, 1.83) | 1.36 (0.94, 1.88) | 1.27 (1.02, 1.69) | 0.548 |
| Uric Acid, μmol/L | 265.00 (199.75, 337.00) | 265.00 (202.50, 337.00) | 267.00 (196.00, 330.25) | 0.476 |
| CA199, U/ml | 42.65 (12.20, 164.20) | 43.00 (12.30, 158.95) | 38.20 (11.47, 168.20) | 0.926 |
| CA125, U/ml | 12.20 (8.20, 19.60) | 12.70 (8.35, 18.65) | 11.50 (8.05, 21.05) | 0.917 |
| CEA, μg/L | 2.80 (1.80, 4.10) | 2.80 (1.85, 4.00) | 2.65 (1.78, 4.12) | 0.867 |
| PT, s | 11.40 (10.90, 12.00) | 11.40 (10.90, 12.05) | 11.45 (11.00, 11.90) | 0.319 |
| APTT, s | 26.40 (25.10, 28.10) | 26.40 (25.00, 27.90) | 26.50 (25.40, 28.10) | 0.106 |
| Fibrinogen, g/L | 3.38 (2.77, 4.08) | 3.35 (2.77, 4.02) | 3.48 (2.79, 4.30) | 0.206 |
| D-dimer, μg/L | 470.00 (260.00, 845.00) | 470.00 (280.00, 845.00) | 410.00 (237.50, 807.50) | 0.198 |
| Blood loss, ml | 200.00 (100.00, 400.00) | 200.00 (100.00, 400.00) | 200.00 (100.00, 400.00) | 0.977 |
| Operation Time, min | 385.00 (305.00, 450.00) | 380.00 (305.00, 450.00) | 395.00 (305.00, 446.25) | 0.278 |
| Approach |  |  |  | 0.706 |
| LPD | 203 (49.39) | 140 (48.78) | 63 (50.81) |  |
| RPD | 208 (50.61) | 147 (51.22) | 61 (49.19) |  |
| intraoperative RBC transfusion |  |  |  | 0.393 |
| NO | 276 (67.15) | 189 (65.85) | 87 (70.16) |  |
| Yes | 135 (32.85) | 98 (34.15) | 37 (29.84) |  |
| Conversion to open surgery |  |  |  | 0.453 |
| NO | 371 (90.27) | 257 (89.55) | 114 (91.94) |  |
| Yes | 40 (9.73) | 30 (10.45) | 10 (8.06) |  |
| TO |  |  |  | 0.938 |
| NO | 148 (36.01) | 103 (35.89) | 45 (36.29) |  |
| Yes | 263 (63.99) | 184 (64.11) | 79 (63.71) |  |

Abbreviation: TO, Textbook Outcome; BMI, body mass index; NRS-2002 score, Nutritional Risk Screening 2002; WBC, white blood cell; AST, aspartate aminotransferase; ALT, alanine aminotransferase; HDL-C, high-density lipoprotein cholesterol; LDL-C, low-density lipoprotein cholesterol; CA19-9, carbohydrate antigen19-9; CEA, carcinoembryonic antigen; CA125, carbohydrate antigen125; PT, **prothrombin time; APTT,** activated partial thromboplastin time; RPD, robot-assisted pancreatoduodenectomy; LPD, laparoscopic pancreatoduodenectomy; RBC, red blood cell.
