# Supplementary material for: Development and Validation of a Machine Learning–Based Model for Predicting Textbook Outcome after Minimally Invasive Pancreaticoduodenectomy
Source: Research Square preprint supplement (doi:10.21203/rs.3.rs-8269976/v1), 2025-12-10
Supplement: Supplementary file 2 [file fe94959ba9dfffd81659d86d.docx]

Table s1 Achievement rate of each parameter

| Parameter | NO POPF | NO BL | NO PPH | NO major complication | NO readmission | NO mortality |
| --- | --- | --- | --- | --- | --- | --- |
| Achievement rate | 80.54% | 97.32% | 93.43% | 66.91% | 94.65% | 99.03% |

Abbreviation: POPF, postoperative pancreatic fistula; BL, bile leak; PPH, postoperative hemorrhage
